# Supplementary material for: Antibacterial Properties of Fucoidans from the Brown Algae Fucus vesiculosus L. of the Barents Sea
Source: MDPI journal article supplement (doi:10.3390/biology10010067), 2021-01-19
Supplement: s1 [file s1]

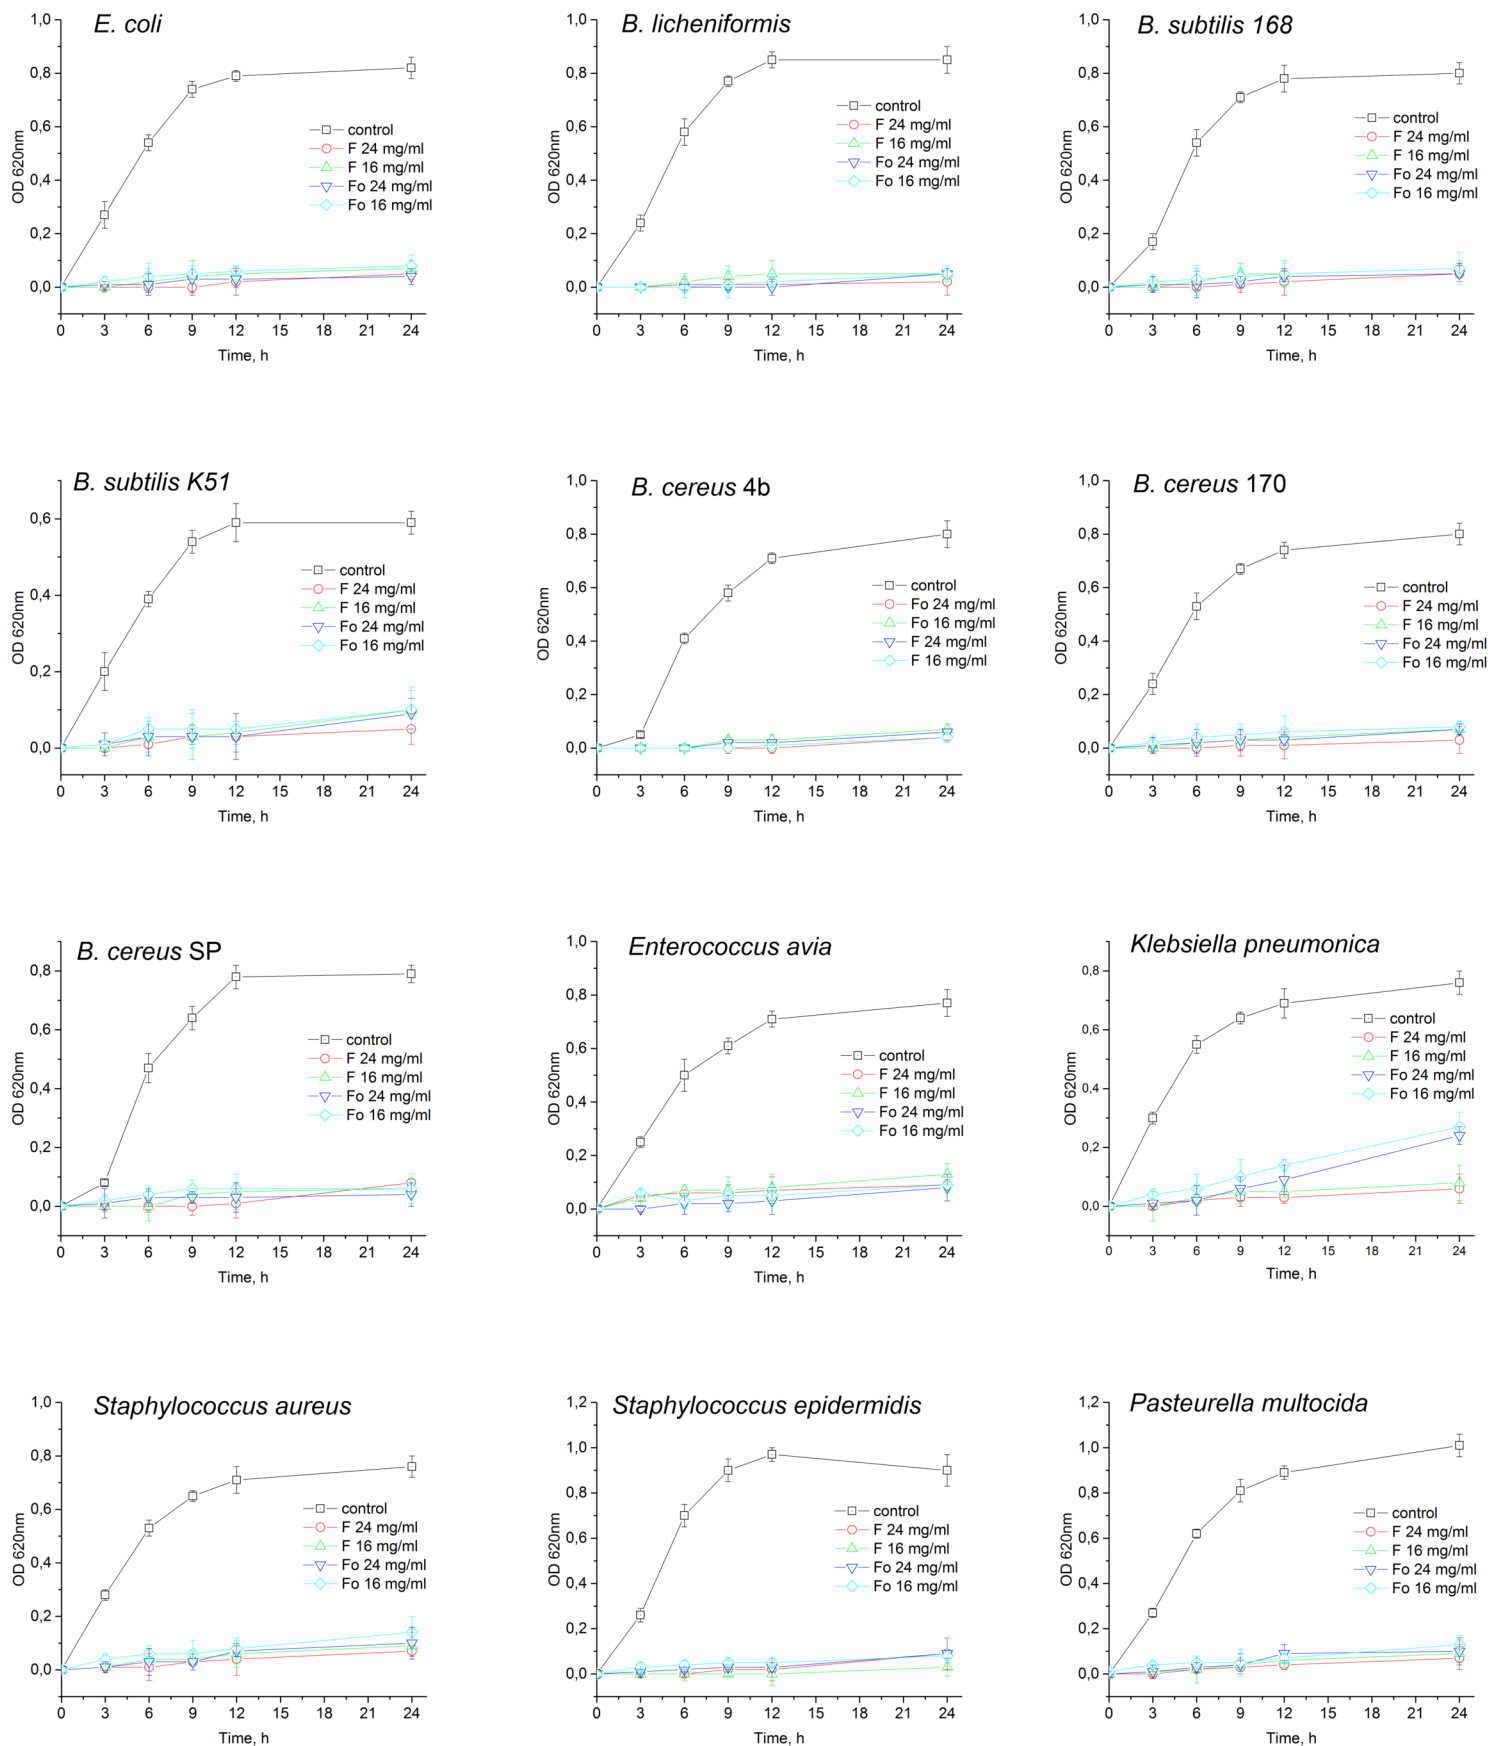

Figure S3. Inhibition of bacterial growth in the presence of 16 and 24 mg/ml concentrations of fucidans F and Fo.
