# Supplementary material for: Antibacterial Properties of Fucoidans from the Brown Algae Fucus vesiculosus L. of the Barents Sea
Source: MDPI journal article supplement (doi:10.3390/biology10010067), 2021-01-19
Supplement: s1 [file s1]

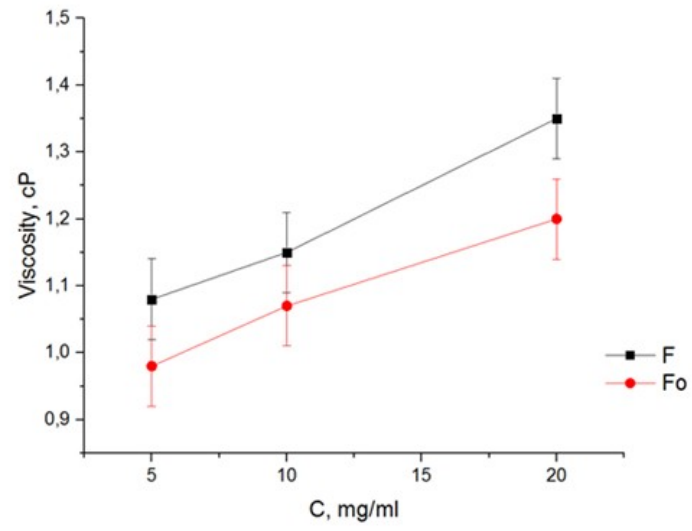

Figure S2. Dynamic viscosity of fucoidans F and Fo. Each value is the mean  $\pm$  SD of three replicates ( $p < 0.01$ ).
