# Supplementary figures and images for: Antibacterial Properties of Fucoidans from the Brown Algae Fucus vesiculosus L. of the Barents Sea
Source: MDPI journal article supplement (doi:10.3390/biology10010067), 2021-01-19

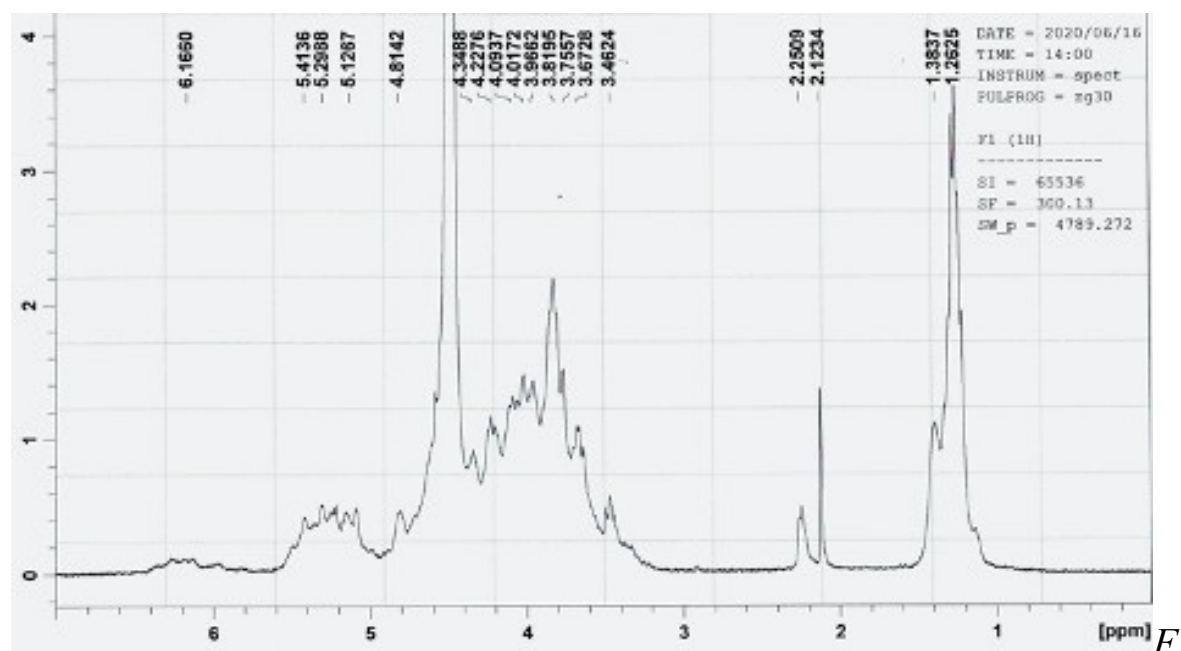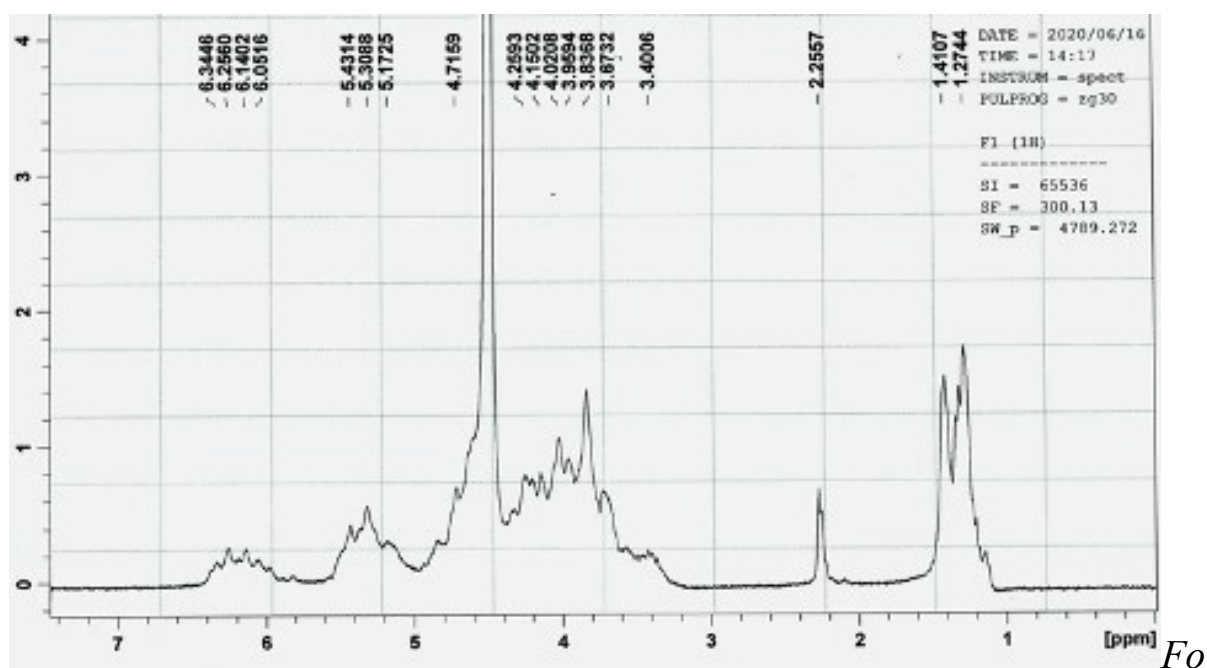

Figure S1.  $^1\text{H}$  NMR spectra of fucoidans F and Fo.

Supplement: s1 [file s1]
